# Supplementary material for: The BRCT domain enhances DNA binding and catalytic efficiency of fungal PARPs
Source: Research Square preprint supplement (doi:10.21203/rs.3.rs-7860866/v1), 2025-10-31
Supplement: Supplementary file 1 [file 3458826525b0b2325cceca41.pdf]

**a**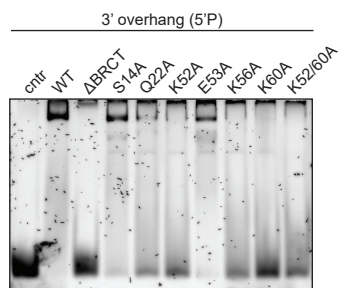**b**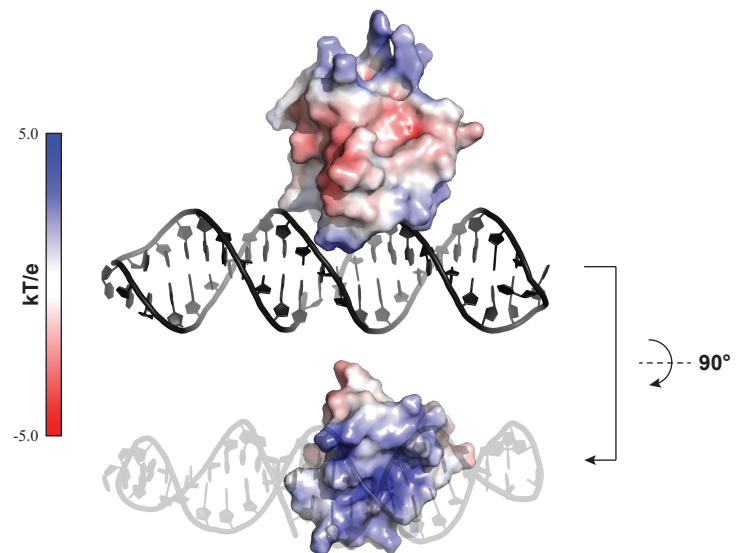

**Extended Data Figure 5. The DNA surface of the BRCT domain has a positive surface potential.**

**(a)** EMSA assay assessing the influence of BRCT mutations on the ability of the WGR domain to bind 5'-phosphorylated DNA with a 3' overhang (DNA-9). *Af*-PARP1 WT or mutants (5  $\mu$ M) were incubated with DNA mimetic (1  $\mu$ M) for 1 h, separated via native PAGE and DNA visualised with SYBR safe staining.

**(b)** The electrostatic potential surface of the isolated BRCT domain was prepared with PDB2PQR<sup>86,87</sup> and calculated using the APBS electrostatics plugins<sup>88</sup> in PyMOL (Schrödinger).
